# Supplementary material for: The quality and reliability of YouTube video content about gingival recession on different time periods
Source: PeerJ. 2025 Jul 7;13:e19653. doi: 10.7717/peerj.19653 (PMC12244128; doi:10.7717/peerj.19653)
Supplement: Supplemental Information 1 [file peerj-13-19653-s001.xlsx]

## Sheet: 2019
2019	Url	GQS (1-5)	VIQI	DISCERN	Modifiye DISCERN	Content Analysis	Duration Time	View	Days Since Upload	Like	Dislike	Comments	Source Of Video
1	https://www.youtube.com/watch?v=Y4akwox7YdE	5	19	44	11	6	1..13	8894	2019-08-27	24	0	Kapalı	Firm
2	https://www.youtube.com/watch?v=ElMydxvupks	4	17	41	11	6	1..13	8452	2019-07-24	19	0	Kapalı	Firm
3	https://www.youtube.com/watch?v=Vi1BgnTADXA	4	15	38	14	4	11..53	6946	25.05.2019.	214	0	34	Dentist
5	https://www.youtube.com/watch?v=p7eHm17C4H0	4	15	38	14	5	10..45	2094	2019-05-24	2 k	0	63	Dentist
6	https://www.youtube.com/watch?v=EZtjWJrMKOs	3	15	38	15	6	4..23	2175	2019-07-24	20	0	1	Dentist
7	https://www.youtube.com/watch?v=4ueRz1xRmx0	2	10	33	12	3	3..44	3704	2019-11-07	47	0	0	Dentist
10	https://www.youtube.com/watch?v=LA2bUoPEPps	4	19	44	19	9	10..25	1165	2019-06-20	13	0	2	Dentist
12	https://www.youtube.com/watch?v=S_Mi2qD2qmY	1	6	16	5	1	10..55	29447	2019-09-05	422	0	108	youtuber
13	https://www.youtube.com/watch?v=T1uJPZs8oZQ	5	20	45	17	7	4..48	92770	2019-06-23	955	0	98	Dentist
19	https://www.youtube.com/watch?v=xu2dIIBOz9c	5	20	54	22	6	2..53	4815	2019-09-12	58	0	2	Dentist
21	https://www.youtube.com/watch?v=5y1BV24F24s	4	18	48	19	7	0..56	23684	2019-04-29	388	0	4	Dentist
23	https://www.youtube.com/watch?v=pye9J4P7cS0	2	10	29	8	3	0..29	68	2019-01-14	3	0	0	youtuber
25	https://www.youtube.com/watch?v=peQ53jmvrqg	2	11	37	17	5	4.00	193337	2019-03-29	1.5 K	0	229	Dentist
31	https://www.youtube.com/watch?v=-B_YbErT0ao	1	4	16	5	0	2..12	1884	2019-05-09	17	0	4	Firm
32	https://www.youtube.com/watch?v=Su76ElHWSoM	1	4	23	8	3	0..30	552	2019-04-25	6	0	5	dentist
36	https://www.youtube.com/watch?v=iXXPK8iViMo	5	20	53	16	10	16..39	6150	2019-11-14	55		3	dentist
38	https://www.youtube.com/watch?v=gB_jU0AVIRA	4	17	55	20	9	9..42	34	2019-11-04	2			dentist
42	https://www.youtube.com/watch?v=sOR5N0zOfjc	4	16	49	15	8	6..08	20604	2019-04-11	85	0	51	Dentist
52	https://www.youtube.com/watch?v=DzrV7O4uv_Q	4	15	51	22	6	3…55	5058	2019-05-29	21	0	0	dentist
73	https://www.youtube.com/watch?v=rFrqYrasWes	2	12	36	11	3	1..04	3434	2019-03-11	5	0	0	dentist
78	https://www.youtube.com/watch?app=desktop&v=ju7aS_6shoM	2	10	24	7	3	1..27	3982	2019-07-16	26	0	2	review
83	https://www.youtube.com/watch?v=7tpsAo-lexY	3	12	30	14	3	0.44	14	2019-01-26	0	0	0	dentist
87	https://www.youtube.com/watch?v=QDAGzRwaSYw	1	4	16	5	1	3..24	129	2019-03-23	1	0	0	product

## Sheet: 2024
2024	url	GQS (1-5)	VIQI	DISCERN	Modifiye DISCERN	Content Analysis	Duration Time	View	Days Since Upload	Like	Dislike	Comments	Source Of Video
1	https://www.youtube.com/watch?v=OcMTcm6wIIU	2	6	25	10	5	20:34:00	1046174	2024-05-11	27 k	0	2259	dentist
2	https://www.youtube.com/watch?v=0sMwEuWroDs	4	11	45	15	7	16:04:00	137355	2024-05-19	3.4 k	0	448	dentist
3	https://www.youtube.com/watch?v=ozR_F6dDN7A	3	13	54	20	9	17:12:00	1548	2024-06-29	74	0	15	dentist
4	https://www.youtube.com/watch?v=InZBMU2xPqo	5	20	57	23	9	01:14:00	1737	2024-09-13	1	0	0	dentist
7	https://www.youtube.com/watch?v=XrMc6CM-DkI	5	17	62	21	9	10:48:00	28782	2024-09-02	900	0	97	youtuber
8	https://www.youtube.com/watch?v=Z5crh3tpgP0	4	19	63	20	6	07:22:00	1429	2024-02-27	0	0	5	dentist
9	https://www.youtube.com/watch?v=0VAnab5oAS4	3	12	35	17	5	09:11:00	4384	2024-04-13	189	0	49	dentist
10	https://www.youtube.com/watch?v=0WoSt7yBxFY	4	13	49	16	8	05:34:00	5	2024-10-16	0	0	0	dentist
11	https://www.youtube.com/watch?v=NLC6HTRhEFI	4	14	64	24	9	27.59	632	2024-03-29	29	0	24	dentist
12	https://www.youtube.com/watch?v=Rvz4IhMuI8M	5	18	64	23	9	03:02:00	295	2024-02-08	4	0	0	dentist
13	https://www.youtube.com/watch?v=sukgXfkjzd0	2	9	31	7	6	04:53:00	71930	09..02.24	1.9 k	0	65	youtuber
14	https://www.youtube.com/watch?app=desktop&v=RRXGQEYaDuM	2	8	26	8	4	00:23:00	46	2024-01-17	1	0	kapalı	dentist
15	https://www.youtube.com/watch?v=yKFVFCQLR6U	4	18	37	12	8	02:56:00	384	2024-10-01	11	0	0	dentist
19	https://www.youtube.com/watch?app=desktop&v=bSliTbymfFo	5	20	77	25	9	26.54	8	2024-05-01	0	0	0	dentist
20	https://www.youtube.com/watch?v=3nKvQsIVKUg	4	14	52	17	8	1 day, 3:21:00	1382	2024-05-03	65	0	23	dentist
23	https://www.youtube.com/watch?v=SsesaO3OQEQ	1	5	17	6	3	00:50:00	2045	2024-04-23	50	0	2	dentist
24	https://www.youtube.com/watch?v=gmGjybiHcaY	2	9	26	11	5	06:19:00	47667	2024-05-16	1.6 k	0	125	dentist
25	https://www.youtube.com/watch?v=BSXf0qLLOHE	3	13	34	14	4	00:33:00	1040	2024-02-28	13	0	0	dentist
27	https://www.youtube.com/watch?v=9cTMp0YUQXE	4	20	52	18	10	08:48:00	761	2024-01-26	20	0	4	dentist
29	https://www.youtube.com/watch?v=g9y0DWRMVdU	3	15	37	16	4	00:31:00	1634	2024-03-01	20	0	0	dentist
31	https://www.youtube.com/watch?v=z3NJ8wiH1B8	2	8	28	14	4	1.28:43	24079	2024-09-07	551	0	108	youtuber
46	https://www.youtube.com/watch?v=VxkuX8xxOZA	1	4	18	7	0	00:54:00	154	2024-10-23	2	0	0	product
47	https://www.youtube.com/watch?v=r--1SueZQGM	2	8	24	11	3	00:36:00	495	2024-03-06	6	0	0	dentist
48	https://www.youtube.com/watch?v=HopyrABhbYU	1	4	16	5	0	00:59:00	32	2024-11-14	0	0	0	product
50	https://www.youtube.com/watch?v=-BpfmKal3Xg&list=PL22kEru8RsjjwJ4HwGRuQyKjgQRyL6L-F&index=49	1	6	19	5	1	13:51:00	51885	2024-03-25	2.8 k	0	0	dentist
55	https://www.youtube.com/watch?v=RIdMzkrVSMc	2	10	25	10	4	06:32:00	3489	2024-02-25	104	0	15	dentist
56	https://www.youtube.com/watch?v=OFTq5plkEI4	2	9	16	7	9	10:41:00	1549	2024-07-13	52	0	32	dentist
57	https://www.youtube.com/watch?v=aAJNVX3rCo8	2	9	32	12	5	07:46:00	3513	2024-02-02	774	0	99	dentist
59	https://www.youtube.com/shorts/U8mTPrBBWwg?app=desktop	1	4	18	7	0	00:27:00	486	2024-10-25	2	0	0	product
60	https://www.youtube.com/watch?v=X3le01LaX5M	3	18	46	20	8	04:10:00	6153	2024-09-24	383	0	43	dentist
69	https://www.youtube.com/watch?v=PPWSHrvrsD4	4	16	52	16	10	06:59:00	1896	2024-03-10	52	0	11	dentist
74	https://www.youtube.com/watch?v=zdUa4MrZWaQ	3	17	45	16	7	06:02:00	823..	2024-10-25	9	0	4	dentist
89	https://www.youtube.com/watch?v=IObqG-jHvA0	2	14	32	14	4	00:53:00	158..	2024-07-30	3	0	0	dentist
95	https://www.youtube.com/watch?app=desktop&v=cPGH6RbBkpE	2	14	37	12	6	00:33:00	749..	2024-02-21	4	0	0	dentist
100	https://www.youtube.com/watch?v=NezZVfIsrXo	5	20	53	21	9	11:51:00	798..	2024-10-11	33	0	1	dentist

## Sheet: Indices
Search Term:
Receding gums
Content Analysis (if yes, score:1 if no, score:0)
1. Has the definition of gingival recession been provided?
2. Have the causes of gingival recession been discussed?
3. Have the symptoms of gingival recession been mentioned?
4. Have the treatment options for gingival recession been addressed?
5. Has it been explained what consequences a patient might face if gingival recession requiring professional intervention is left untreated?
6. Has information been provided on how individuals with gingival recession should perform oral care?
7. Has it been emphasized that a patient with gingival recession should consult a specialist dentist?
8. Have the precautions to prevent the occurrence of gingival recession been discussed?
9. Was the video uploaded by a healthcare professional?
10. Does the video include relevant and supportive visuals or animations?
Total score; 0=not useful, 1-4: slightly useful, 5-7: moderately useful, 8-10=very useful
In statistical analysis, it was categorized in two: useful and not useful
GQS
1:Poor quality, poor flow of the video, most information missing, not at all useful for patients
2:Generally poor quality and poor flow, some information listed but many important topics missing, of very limited use for patients
3:Moderate quality, suboptimal flow, some important information is adequately discussed but others poorly discussed, somewhat useful for patients
4:Good quality and generally good flow, most of the relevant information is listed but some topics not covered, useful for patients
5:Excellent quality and flow, very useful for patients
VIQI (each one is scored 1 to 5)
VIQI-1:Flow of information
VIQI-2:Information accuracy
VIQI-3:Quality (Videos including one point for each one image, animation, interview, video captions and summary
VIQI-4:Precision (Level of coherence between video title and content)
Total VIQI Score:Stam of all VIQI scores
DISCERN
1)Are the aims clear?
2)Does it achieve its aims?
3)Is it relevant?
4)Is it clear what soures of information were used to compile the publication (other than the author or producer)?
5)Is it clear when the information used or reported in the publication was produced?
6)Is it balanced and unbiased?
7)Does it provide details of additional sources of support and information?
8)Does it refer to areas of uncertainty?
9)Does it describe how each treatment works?
10)Does it describe the benefits of each treatment?
11)Does it describe the risks of each treatment?
12)Does it describe what would happen if no treatment is used?
13)Does it describe how the treatment choices affect overall quality of life?
14)Is it clear that there may be more than one possible treatment choice?
15)Does it provied support for shared decision making?
16)Based on the answers to all of these questions, rate the overall quality of the publication as a source of information about treatment choices?
Total score: 16-26=very poor, 27-38=poor, 39-50=fair, 51-62=good, >62=very good
Modified Discern
1)Are the aims clear and achieved?
2)Are reliable sources of information used? (i.e., publication cited, speaker is specialist in diabetics?)
3)Is the information presented both balanced and unbiased?
4)Are additional sources of information listed for patient reference?
5)Are areas of uncertainty mentioned?

## Sheet: Statistical analysis
	2019(n:23)	2024(n:35)	p
Video Characteristics
Video Length	3,7(8,7)	6,3(10,9)	0.301
View	3982(7729)	1549(5667)	0.199
Likes	21(52)	29(380)	0.813
Comments	3(43)	4(43)	0.971				2019			2024
Days since upload	2097(138)	199(196)	p<0,001				1.	2.	ICC	1.	2.	ICC
Reliability Scores						GQS (1-5)	3±1	3±1	0.892	3±1	3±1	0.981
DISCERN	39±14	40±17	0,687**			VIQI	13±5	13±6	0.991	12±5	13±5	0.993
Modifiye DISCERN	14±6	15±6	0,629**			DISCERN	37±12	39±14	0.986	39±17	40±17	0.994
Quality Scores						Modified DISCERN	13±5	14±6	0.93	14±6	15±6	0.989
GQS	4(2)	3(2)	0.738			Content Analysis	5±3	5±3	0.989	6±3	6±3	0.988
VIQI	14(11)	13(10)	0.56			(ICC:Inter Class Correlation
Content
Content Analysis	5(4)	6(5)	0.081
Source Of Video
Dentist	16(%70)	29(%83)	0,235*			(n:58)
Other	7(%30)	6(%17)						GQS (1-5)	VIQI	DISCERN	Modified DISCERN
(p:Mann-Whitney U Test, median(IQR), p*:Ki-Kare n(%), p**:Independent Sample t Test mean(std.dev))						Video Characteristics
						Video Length	r	0.288	0.227	0.378	0.283
							p	0.029	0.087	0.003	0.031
						Views	r	0.058	0.032	-0.004	-0.062
2019							p	0.679	0.818	0.976	0.658
	Nor Usefull(n:11)	Usefull(n:12)	p			Likes	r	0.042	-0.031	0.005	-0.031
Video Characteristics							p	0.758	0.821	0.972	0.822
Video Length	2,2(3,3)	4,7(8)	0.165			Comments	r	0.051	-0.046	0.047	0.02
View	3434(6817)	5604(12614)	0.242				p	0.714	0.742	0.734	0.885
Likes	12(44)	24(66)	0.181			Days since upload	r	-0.002	0.031	-0.029	-0.051
Comments	2(34)	3(49)	0.512				p	0.989	0.819	0.831	0.705
Days since upload	2131(127)	2057(100)	0.031			Content
Reliability Scores						Content Analysis	r	0.793	0.788	0.842	0.725
DISCERN	27±9	49±8	p<0,001**				p	p<0,001	p<0,001	p<0,001	p<0,001
Modifiye DISCERN	11±7	17±4	0,014**			Source Of Video	r	-0.311	-0.398	-0.379	-0.492
Quality Scores							p	0.017	0.002	0.003	p<0,001
GQS	2(2)	4(1)	p<0,001			(Spearman Correlation)
VIQI	9(7)	18(4)	p<0,001
Source Of Video
Dentist	6(%55)	10(%83)	0,296*
Other	5(%45)	2(%17)				2019(n:23)
(p:Mann-Whitney U Test, median(IQR), p*:Ki-Kare n(%), p**:Independent Sample t Test mean(std.dev))								GQS (1-5)	VIQI	DISCERN	Modified DISCERN
						Video Characteristics
2024						Video Length	r	0.215	0.304	0.349	0.193
	Nor Usefull(n:9)	Usefull(n:26)	p				p	0.324	0.159	0.103	0.377
Video Characteristics						Views	r	0.393	0.302	0.303	0.053
Video Length	1(8,6)	6,8(8,9)	0.151				p	0.064	0.161	0.16	0.812
View	495(4230)	1592(5392)	0.408			Likes	r	0.468	0.34	0.278	0.08
Likes	6(187)	31(379)	0.473				p	0.033	0.131	0.222	0.729
Comments	0(26)	8(43)	0.23			Comments	r	0.145	0.116	0.106	-0.044
Days since upload	206(193)	195(188)	0.234				p	0.543	0.626	0.657	0.854
Reliability Scores						Days since upload	r	-0.388	-0.452	-0.452	-0.175
DISCERN	23±6	46±16	p<0,001**				p	0.067	0.03	0.031	0.425
Modifiye DISCERN	9±4	17±5	p<0,001**			Content
Quality Scores						Content Analysis	r	0.819	0.879	0.941	0.722
GQS	2(1)	4(1)	p<0,001				p	p<0,001	p<0,001	p<0,001	p<0,001
VIQI	8(3)	15(7)	p<0,001			Source Of Video	r	-0.337	-0.387	-0.499	-0.73
Source Of Video							p	0.116	0.068	0.015	p<0,001
Dentist	5/%56)	24(%92)	0,045*			(Spearman Correlation)
Other	4(%44)	2(%8)
(p:Mann-Whitney U Test, median(IQR), p*:Ki-Kare n(%), p**:Independent Sample t Test mean(std.dev))
						2024(n:35)
	Nor Usefull(n:20)	Usefull(n:38)	p					GQS (1-5)	VIQI	DISCERN	Modified DISCERN
Video Characteristics						Video Characteristics
Video Length	(0)	(0)	0.017			Video Length	r	0.298	0.184	0.375	0.348
View	(0)	(0)	0.316				p	0.082	0.29	0.026	0.041
Likes	(0)	(0)	0.161			Views	r	-0.174	-0.155	-0.131	-0.067
Comments	(0)	(0)	0.172				p	0.35	0.404	0.483	0.721
Days since upload	(0)	(0)	0.13			Likes	r	-0.165	-0.222	-0.109	-0.086
Reliability Scores							p	0.343	0.201	0.532	0.624
DISCERN	25±8	47±14	p<0,001			Comments	r	-0.039	-0.164	0.005	0.038
Modifiye DISCERN	10±6	17±5	p<0,001				p	0.825	0.355	0.98	0.831
Quality Scores						Days since upload	r	0.071	0.121	0.171	0.112
GQS	2(1)	4(2)	p<0,001				p	0.687	0.489	0.327	0.523
VIQI	8(6)	16(16)	p<0,001			Content
Source Of Video						Content Analysis	r	0.833	0.809	0.815	0.754
Dentist	11(%55)	34(%89)	0.008				p	p<0,001	p<0,001	p<0,001	p<0,001
Other	9(%45)	4(%11)				Source Of Video	r	-0.323	-0.442	-0.282	-0.312
(p:Mann-Whitney U Test, median(IQR), p*:Ki-Kare n(%), p**:Independent Sample t Test mean(std.dev))				OR(%95CI):2,5(1,1-5,6)			p	0.058	0.008	0.101	0.068
						(Spearman Correlation)
